# Supplementary material for: Phenotypic and Genotypic screening of fifty-two rice (Oryza sativa L.) genotypes for desirable cultivars against blast disease
Source: PubMed Central journal article supplement (PMC10004593; doi:10.1371/journal.pone.0280762), 2023-03-10
Supplement: pone.0280762.s001.pdf [file pone.0280762.s001.pdf]

# PLOS ONE

## Phenotypic and Genotypic screening of fifty-two rice (*Oryza sativa* L.) germplasms for desirable cultivars against blast disease

--Manuscript Draft--

|                                |                                                                                                                                                                                                                                                                                                                                                                                                                                                                                                                                                                                                                                                                                                                                                                                                                                                                                                                                                                                                                                                                                                                                                                                                                                                                                                                                                                                                                                                                                                                                                                                                                                                                                                                                                                                                                                                                                                                                                                                        |
|--------------------------------|----------------------------------------------------------------------------------------------------------------------------------------------------------------------------------------------------------------------------------------------------------------------------------------------------------------------------------------------------------------------------------------------------------------------------------------------------------------------------------------------------------------------------------------------------------------------------------------------------------------------------------------------------------------------------------------------------------------------------------------------------------------------------------------------------------------------------------------------------------------------------------------------------------------------------------------------------------------------------------------------------------------------------------------------------------------------------------------------------------------------------------------------------------------------------------------------------------------------------------------------------------------------------------------------------------------------------------------------------------------------------------------------------------------------------------------------------------------------------------------------------------------------------------------------------------------------------------------------------------------------------------------------------------------------------------------------------------------------------------------------------------------------------------------------------------------------------------------------------------------------------------------------------------------------------------------------------------------------------------------|
| <b>Manuscript Number:</b>      | PONE-D-22-18593                                                                                                                                                                                                                                                                                                                                                                                                                                                                                                                                                                                                                                                                                                                                                                                                                                                                                                                                                                                                                                                                                                                                                                                                                                                                                                                                                                                                                                                                                                                                                                                                                                                                                                                                                                                                                                                                                                                                                                        |
| <b>Article Type:</b>           | Research Article                                                                                                                                                                                                                                                                                                                                                                                                                                                                                                                                                                                                                                                                                                                                                                                                                                                                                                                                                                                                                                                                                                                                                                                                                                                                                                                                                                                                                                                                                                                                                                                                                                                                                                                                                                                                                                                                                                                                                                       |
| <b>Full Title:</b>             | Phenotypic and Genotypic screening of fifty-two rice ( <i>Oryza sativa</i> L.) germplasms for desirable cultivars against blast disease                                                                                                                                                                                                                                                                                                                                                                                                                                                                                                                                                                                                                                                                                                                                                                                                                                                                                                                                                                                                                                                                                                                                                                                                                                                                                                                                                                                                                                                                                                                                                                                                                                                                                                                                                                                                                                                |
| <b>Short Title:</b>            | Screening of desirable rice cultivars against blast disease                                                                                                                                                                                                                                                                                                                                                                                                                                                                                                                                                                                                                                                                                                                                                                                                                                                                                                                                                                                                                                                                                                                                                                                                                                                                                                                                                                                                                                                                                                                                                                                                                                                                                                                                                                                                                                                                                                                            |
| <b>Corresponding Author:</b>   | Akbar Hossain, Ph.D<br>Bangladesh Wheat and Maize Research Institute (BWMRI)<br>Dinajpur, Rangpur Division BANGLADESH                                                                                                                                                                                                                                                                                                                                                                                                                                                                                                                                                                                                                                                                                                                                                                                                                                                                                                                                                                                                                                                                                                                                                                                                                                                                                                                                                                                                                                                                                                                                                                                                                                                                                                                                                                                                                                                                  |
| <b>Keywords:</b>               | Magnaporthe oryzae; Rice blast; Phenotyping; Resistance genes; Molecular markers                                                                                                                                                                                                                                                                                                                                                                                                                                                                                                                                                                                                                                                                                                                                                                                                                                                                                                                                                                                                                                                                                                                                                                                                                                                                                                                                                                                                                                                                                                                                                                                                                                                                                                                                                                                                                                                                                                       |
| <b>Abstract:</b>               | <p>Magnaporthe oryzae, the rice blast fungus, is one of the most dangerous rice pathogens, causing considerable crop losses around the world. In order to explore the rice blast-resistant sources, <del>we initially performed a</del> large-scale screening of 277 rice accessions <u>was done</u>. In parallel with field evaluations, fifty-two rice accessions were genotyped for 25 major blast resistance genes utilizing functional/gene-based markers based on their reactivity against rice blast disease. According to the phenotypic examination, 29(58%) and 22 (42%) entries were found to be highly resistant, 18 (36%) and 29 (57%) showed moderate resistance, and 05 (6%) and 01 (1%), respectively, were highly susceptible to leaf and neck blast. The genetic frequency of 25 major blast resistance genes ranged from 32 to 60%, with two genotypes having a maximum of 16 R -genes each. The 52 rice accessions were divided into two groups based on cluster and population structure analysis. The highly resistant and moderately resistant accessions are divided into different groups using the principal coordinate analysis. According to the analysis of molecular variance, the maximum diversity was found within the population, while the minimum diversity was found between the populations. Two markers (RM5647 and K39512), which correspond to the blast-resistant genes Pi36 and Pik, respectively, showed a significant association to the neck blast disease, whereas three markers (Pi2-i, Pita3, and k2167), which correspond to the blast-resistant genes Pi2, Pita/Pita2, and Pikm, respectively, showed a significant association to the leaf blast disease. The associated R-genes might be utilized in rice breeding programmes through marker-assisted breeding, and the identified resistant rice accessions could be used as prospective donors for the production of new resistant varieties in India and around the world.</p> |
| <b>Order of Authors:</b>       | Jeevan B., Ph.D<br>Rajashekara Hosahatti<br>Prasanna S. Koti<br>Vinaykumar Hargi Devappa<br>Umakanta Ngangkham<br>Pramesh Devanna<br>Manoj Kumar Yadav<br>Krishna Kant Mishra<br>Jay Prakash Aditya<br>Palanna Kaki Boraiah<br>Ahmed Gaber<br>Akbar Hossain, Ph.D                                                                                                                                                                                                                                                                                                                                                                                                                                                                                                                                                                                                                                                                                                                                                                                                                                                                                                                                                                                                                                                                                                                                                                                                                                                                                                                                                                                                                                                                                                                                                                                                                                                                                                                      |
| <b>Additional Information:</b> |                                                                                                                                                                                                                                                                                                                                                                                                                                                                                                                                                                                                                                                                                                                                                                                                                                                                                                                                                                                                                                                                                                                                                                                                                                                                                                                                                                                                                                                                                                                                                                                                                                                                                                                                                                                                                                                                                                                                                                                        |

| Question                                                                                                                                                                                                                                                                                                                                                                                                                                                                                                                                                                                                                                                                                                                                                                                                                                                                                                                                                                                                                                                                                                                                                                                                                                                                                                                                                                            | Response                                                                                                                             |
|-------------------------------------------------------------------------------------------------------------------------------------------------------------------------------------------------------------------------------------------------------------------------------------------------------------------------------------------------------------------------------------------------------------------------------------------------------------------------------------------------------------------------------------------------------------------------------------------------------------------------------------------------------------------------------------------------------------------------------------------------------------------------------------------------------------------------------------------------------------------------------------------------------------------------------------------------------------------------------------------------------------------------------------------------------------------------------------------------------------------------------------------------------------------------------------------------------------------------------------------------------------------------------------------------------------------------------------------------------------------------------------|--------------------------------------------------------------------------------------------------------------------------------------|
| <p><b>Financial Disclosure</b></p> <p>Enter a financial disclosure statement that describes the sources of funding for the work included in this submission. Review the <a href="#">submission guidelines</a> for detailed requirements. View published research articles from <a href="#">PLOS ONE</a> for specific examples.</p> <p>This statement is required for submission and <b>will appear in the published article</b> if the submission is accepted. Please make sure it is accurate.</p> <p><b>Unfunded studies</b><br/>Enter: <i>The author(s) received no specific funding for this work.</i></p> <p><b>Funded studies</b><br/>Enter a statement with the following details:</p> <ul style="list-style-type: none"> <li>• Initials of the authors who received each award</li> <li>• Grant numbers awarded to each author</li> <li>• The full name of each funder</li> <li>• URL of each funder website</li> <li>• Did the sponsors or funders play any role in the study design, data collection and analysis, decision to publish, or preparation of the manuscript?</li> <li>• <b>NO</b> - Include this sentence at the end of your statement: <i>The funders had no role in study design, data collection and analysis, decision to publish, or preparation of the manuscript.</i></li> <li>• <b>YES</b> - Specify the role(s) played.</li> </ul> <p>* typeset</p> | <p>The funders had no role in study design, data collection and analysis, decision to publish, or preparation of the manuscript.</p> |
| <p><b>Competing Interests</b></p> <p>Use the instructions below to enter a competing interest statement for this submission. On behalf of all authors, disclose any <a href="#">competing interests</a> that could be perceived to bias this work—acknowledging all financial support and any other relevant financial or non-financial competing interests.</p>                                                                                                                                                                                                                                                                                                                                                                                                                                                                                                                                                                                                                                                                                                                                                                                                                                                                                                                                                                                                                    | <p>The authors have declared that no competing interests exist</p>                                                                   |

This statement is **required** for submission and **will appear in the published article** if the submission is accepted. Please make sure it is accurate and that any funding sources listed in your Funding Information later in the submission form are also declared in your Financial Disclosure statement.

View published research articles from [PLOS ONE](#) for specific examples.

**NO authors have competing interests**

Enter: *The authors have declared that no competing interests exist.*

**Authors with competing interests**

Enter competing interest details beginning with this statement:

*I have read the journal's policy and the authors of this manuscript have the following competing interests: [insert competing interests here]*

\* typeset

**Ethics Statement**

N/A

Enter an ethics statement for this submission. This statement is required if the study involved:

- Human participants
- Human specimens or tissue
- Vertebrate animals or cephalopods
- Vertebrate embryos or tissues
- Field research

Write "N/A" if the submission does not require an ethics statement.

General guidance is provided below. Consult the [submission guidelines](#) for detailed instructions. **Make sure that all information entered here is included in the Methods section of the manuscript.**

|                                                                                                                                                                                                                                                                                                                                                                                                                                                                                                                                                                                                                                                                                                                                                                                                                                                                                                                                                                                                                                                                                                                                                                                                                                                                                                                                                                                                                                                                                                                                                                                                                           |                                                               |
|---------------------------------------------------------------------------------------------------------------------------------------------------------------------------------------------------------------------------------------------------------------------------------------------------------------------------------------------------------------------------------------------------------------------------------------------------------------------------------------------------------------------------------------------------------------------------------------------------------------------------------------------------------------------------------------------------------------------------------------------------------------------------------------------------------------------------------------------------------------------------------------------------------------------------------------------------------------------------------------------------------------------------------------------------------------------------------------------------------------------------------------------------------------------------------------------------------------------------------------------------------------------------------------------------------------------------------------------------------------------------------------------------------------------------------------------------------------------------------------------------------------------------------------------------------------------------------------------------------------------------|---------------------------------------------------------------|
| <p><b>Format for specific study types</b></p> <p><b>Human Subject Research (involving human participants and/or tissue)</b></p> <ul style="list-style-type: none"> <li>• Give the name of the institutional review board or ethics committee that approved the study</li> <li>• Include the approval number and/or a statement indicating approval of this research</li> <li>• Indicate the form of consent obtained (written/oral) or the reason that consent was not obtained (e.g. the data were analyzed anonymously)</li> </ul> <p><b>Animal Research (involving vertebrate animals, embryos or tissues)</b></p> <ul style="list-style-type: none"> <li>• Provide the name of the Institutional Animal Care and Use Committee (IACUC) or other relevant ethics board that reviewed the study protocol, and indicate whether they approved this research or granted a formal waiver of ethical approval</li> <li>• Include an approval number if one was obtained</li> <li>• If the study involved <i>non-human primates</i>, add <i>additional details</i> about animal welfare and steps taken to ameliorate suffering</li> <li>• If anesthesia, euthanasia, or any kind of animal sacrifice is part of the study, include briefly which substances and/or methods were applied</li> </ul> <p><b>Field Research</b></p> <p>Include the following details if this study involves the collection of plant, animal, or other materials from a natural setting:</p> <ul style="list-style-type: none"> <li>• Field permit number</li> <li>• Name of the institution or relevant body that granted permission</li> </ul> |                                                               |
| <p><b>Data Availability</b></p> <p>Authors are required to make all data underlying the findings described fully available, without restriction, and from the time of publication. PLOS allows rare exceptions to address legal and ethical concerns. See the <a href="#">PLOS Data Policy</a> and <a href="#">FAQ</a> for detailed information.</p>                                                                                                                                                                                                                                                                                                                                                                                                                                                                                                                                                                                                                                                                                                                                                                                                                                                                                                                                                                                                                                                                                                                                                                                                                                                                      | <p>Yes - all data are fully available without restriction</p> |

A Data Availability Statement describing where the data can be found is required at submission. Your answers to this question constitute the Data Availability Statement and **will be published in the article**, if accepted.

**Important:** Stating 'data available on request from the author' is not sufficient. If your data are only available upon request, select 'No' for the first question and explain your exceptional situation in the text box.

Do the authors confirm that all data underlying the findings described in their manuscript are fully available without restriction?

**Describe where the data may be found in full sentences. If you are copying our sample text, replace any instances of XXX with the appropriate details.**

All relevant data are within the manuscript

- If the data are **held or will be held in a public repository**, include URLs, accession numbers or DOIs. If this information will only be available after acceptance, indicate this by ticking the box below. For example: *All XXX files are available from the XXX database (accession number(s) XXX, XXX).*
- If the data are all contained **within the manuscript and/or Supporting Information files**, enter the following: *All relevant data are within the manuscript and its Supporting Information files.*
- If neither of these applies but you are able to provide **details of access elsewhere**, with or without limitations, please do so. For example:

*Data cannot be shared publicly because of [XXX]. Data are available from the XXX Institutional Data Access / Ethics Committee (contact via XXX) for researchers who meet the criteria for access to confidential data.*

*The data underlying the results presented in the study are available*

|                                                                                                                                                                                                                                                                                   |  |
|-----------------------------------------------------------------------------------------------------------------------------------------------------------------------------------------------------------------------------------------------------------------------------------|--|
| <p><i>from (include the name of the third party and contact information or URL).</i></p> <ul style="list-style-type: none"><li>• This text is appropriate if the data are owned by a third party and authors do not have permission to share the data.</li></ul> <p>* typeset</p> |  |
| Additional data availability information:                                                                                                                                                                                                                                         |  |

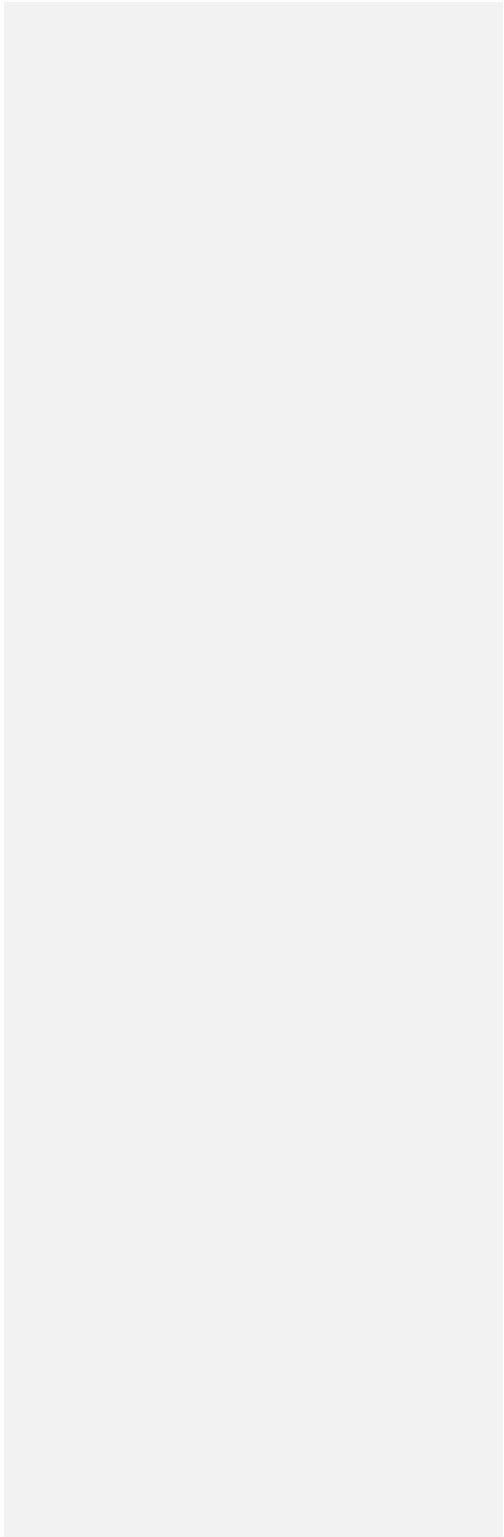

1 **Phenotypic and Genotypic screening of fifty-two rice (*Oryza sativa* L.) germplasms**  
2 **for desirable cultivars against blast disease**

3  
4 **Jeevan B.**<sup>1,\*</sup>, **Rajashekara Hosahatti**<sup>1</sup>, **Prasanna S. Koti**<sup>2</sup>, **Vinaykumar Hargi Devappa**<sup>3</sup>,  
5 **Umakanta Ngangkham**<sup>4</sup>, **Pramesh Devanna**<sup>5</sup>, **Manoj Kumar Yadav**<sup>6</sup>, **Krishna Kant Mishra**<sup>1</sup>,  
6 **Jay Prakash Aditya**<sup>1</sup>, **Palanna Kaki Boraiah**<sup>3</sup>, **Ahmed Gaber**<sup>7</sup> and **Akbar Hossain**<sup>8,\*</sup>

7  
8 <sup>1</sup> ICAR-Vivekananda Parvatiya Krishi Anusandhan Sansthan, Almora, Uttarakhand 263601, India;  
9 [jeevan.bscag@gmail.com](mailto:jeevan.bscag@gmail.com) (J.B.); [rajaiaripath@gmail.com](mailto:rajaiaripath@gmail.com) (R.H.); [mishrakpatho@gmail.com](mailto:mishrakpatho@gmail.com)  
10 (K.K.M.); [jayprakashaditya@gmail.com](mailto:jayprakashaditya@gmail.com) (J.P.A.)

11 <sup>2</sup> The University of Trans-Disciplinary Health Sciences and Technology, Jarakabande Kaval, Benga-  
12 luru, Karnataka 560064, India; [prasanskoti@googlemail.com](mailto:prasanskoti@googlemail.com)

13 <sup>3</sup> Project Coordinating Unit, ICAR-AICRP on Small Millets, UAS, GKVK, Bengaluru, Karnataka  
14 560064, India; [hargi.vinay@gmail.com](mailto:hargi.vinay@gmail.com) (V.H.D.); [kbpalanna@gmail.com](mailto:kbpalanna@gmail.com) (P.K.B.)

15 <sup>4</sup> ICAR- Research Complex for North- Eastern Hill Region, Manipur centre, Imphal, Manipur  
16 795004, India; [ukbiotech@gmail.com](mailto:ukbiotech@gmail.com)

17 <sup>5</sup> Rice Pathology Laboratory, AICRIP, Gangavathi, University of Agricultural Sciences, UAS Cam-  
18 pus, Lingsugur Road, Raichur-584 104, Karnataka, India; [parmi.iari@gmail.com](mailto:parmi.iari@gmail.com)

19 <sup>6</sup> Regional Station, ICAR-Indian Agricultural Research Institute, Karnal, Haryana 132001, India;  
20 [m.yadav14@gmail.com](mailto:m.yadav14@gmail.com)

21 <sup>8</sup> Department of Biology, College of Science, Taif University, P.O. Box 11099, Taif 21944, Saudi  
22 Arabia; [a.gaber@tu.edu.sa](mailto:a.gaber@tu.edu.sa)

23 <sup>9</sup> Department of Agronomy, Bangladesh Wheat and Maize Research Institute, Dinajpur 5200,  
24 Bangladesh

25 \* All correspondence: [jeevan.bscag@gmail.com](mailto:jeevan.bscag@gmail.com) (J.B.); [akbar.hossain@bwmri.gov.bd](mailto:akbar.hossain@bwmri.gov.bd) (A.H.)

26  
27  
28  
29  
30  
31  
32  
33  
34  
35  
36

37 **Phenotypic and Genotypic screening of fifty-two rice (*Oryza sativa* L.) germplasms**  
38 **for desirable cultivars against blast disease**

39  
40 **Abstract**

41 *Magnaporthe oryzae*, the rice blast fungus, is one of the most dangerous rice pathogens, causing con-  
42 siderable crop losses around the world. In order to explore the rice blast-resistant sources, we initially  
43 performed a large-scale screening of 277 rice accessions. In parallel with field evaluations, fifty-two  
44 rice accessions were genotyped for 25 major blast resistance genes utilizing functional/gene-based  
45 markers based on their reactivity against rice blast disease. According to the phenotypic examination,  
46 29 (58%) and 22 (42 %) entries were found to be highly resistant, 18 (36%) and 29 (57%) showed  
47 moderate resistance, and 05 (6%) and 01 (1%), respectively, were highly susceptible to leaf and neck  
48 blast. The genetic frequency of 25 major blast resistance genes ranged from 32 to 60%, with two geno-  
49 types having a maximum of 16 *R*-genes each. The 52 rice accessions were divided into two groups  
50 based on cluster and population structure analysis. The highly resistant and moderately resistant acces-  
51 sions are divided into different groups using the principal coordinate analysis. According to the analysis  
52 of molecular variance, the maximum diversity was found within the population, while the minimum  
53 diversity was found between the populations. Two markers (RM5647 and K39512), which correspond  
54 to the blast-resistant genes *Pi36* and *Pik*, respectively, showed a significant association to the neck blast  
55 disease, whereas three markers (*Pi2-i*, *Pita3*, and *k2167*), which correspond to the blast-resistant genes  
56 *Pi2*, *Pita/Pita2*, and *Pikm*, respectively, showed a significant association to the leaf blast disease. The  
57 associated *R*-genes might be utilized in rice breeding programmes through marker-assisted breeding,  
58 and the identified resistant rice accessions could be used as prospective donors for the production of  
59 new resistant varieties in India and around the world.

60 **Keywords:** *Magnaporthe oryzae*; Rice blast; Phenotyping; Resistance genes; Molecular markers

61 **1. Introduction**

62 Rice blast disease, caused by filamentous fungus *Magnaporthe oryzae* (anamorph *Pyricularia ory-*  
63 *zae*), remains a potential threat to global rice production [1,2]. The blast pathogen can be found in all  
64 stages of plants growth and development, causing damage to leaves (leaf blast), nodes (nodal blast),  
65 and panicles (neck blast), as well as decreasing grain yield by up to 90% in favourable environmental  
66 conditions [3,4,54].

67 The *M. oryzae* has been documented all over the world and can infect more than 50 host species  
68 in the family Poaceae, including rice, wheat, pearl millet, foxtail millet, and finger millet [6 - 8]. Across  
69 most of the world's rice-growing regions, including India, blast disease epidemics have occurred [9,10].  
70 Between 1980 and 1987, India experienced several deadly blast disease epidemics in Himachal Pradesh,  
71 Tamil Nadu, Andhra Pradesh, and Haryana [11,12].



72 Chemical fungicides have been useful in controlling the disease, but they are expensive [13,14],  
73 ineffective when disease pressure is high [15], and may contribute to pathogen resistance [16]. As a  
74 result, the most cost-effective and environmentally acceptable strategy for controlling rice blast disease  
75 is to leverage host resistance (*R* genes). Around 118 *R* genes have been discovered so far, with 35 of  
76 them being successfully cloned and characterized for leaf blast resistance [17,18]. However, the cloned  
77 *R* genes that possess broad-spectrum resistance to leaf blast, have not been tested for neck blast disease  
78 [19]. Even though neck blast is the most devastating stage of the disease, there is relatively little infor-  
79 mation on the genetic processes that underpin neck blast resistance. Nevertheless, 14 QTLs [18] and a  
80 few *R* genes have been found for neck blast resistance, including *Pi25(t)* [20], *Pb1* [21], *Pi64* [22], *Pi-*  
81 *jnw1* [23], and *Pi68(t)* [24]. A large majority of the cloned blast *R* genes share nucleotide-binding site  
82 (NBS) and leucine-rich repeat (LRR) domains in their protein sequences, except for a few (*Pid2*, *pi21*,  
83 and *Ptr*) [17,25,26,]. According to gene-for-gene theory, these *R* genes are race-specific and related to  
84 the hypersensitive response (HR) [27]. The *M. oryzae*'s genome contains numerous repetitive DNA and  
85 retro-transposons [28], which might cause mutations in genes that mediate the pathogen's virulence and  
86 host range, [29 - 31], allowing the fungus to develop new deadly races. The emergence of these races  
87 results in a change in pathogenicity, posing a threat to existing blast-resistant rice cultivars. [32].

88 By permitting the integration of the desired gene(s) in early breeding generations, marker-assisted  
89 selection (MAS) has emerged as a potent method that has advanced the rice breeding effort for blast  
90 disease resistance [33]. Many rice cultivars have been improved *via* MAS by pyramiding targeted *R*  
91 genes, resulting in the rapid release of rice varieties with durable resistance against blast disease [34].  
92 In recent years, molecular markers have been utilized to capitalize on natural variety and pinpoint the  
93 gene of interest influencing essential features in different germplasm [35].

94 There is indeed a lot of genetic variation in the Indian rice germplasm collection [12,36]. Many of  
95 these rice varieties have been reported to have resistance to biotic and abiotic stresses, including blast  
96 disease [37-39]. However, the distribution of *R* genes in Indian rice cultivars that confer long-term  
97 resistance to leaf and neck blast has not been adequately explored. As a result, it's critical to comprehend  
98 *R* gene information in rice germplasm as well as the resistant spectrum of relevant *R* genes against  
99 prevailing pathogen races to use the most successful ones in the rice breeding programme to combat  
100 blast disease. The present study was carried out to explore the genetic association of 25 mapped re-  
101 sistance genes in 52 rice accessions, including released varieties, advanced breeding materials, and tra-  
102 ditional rice varieties using linked/functional markers. The main goal of this study was to find an asso-  
103 ciation between the leaf and neck blast *R* genes, which impart blast resistance to these lines, and novel  
104 blast resistance donor sources (*R* genes/alleles).

105

106

107 **Materials and Methods**

108 **Plant Materials Used in the Current Research**

109 A total of 50 rice accessions were collected based on documented rice blast resistant information  
110 from the Rice Genetics laboratory, Crop Improvement Division, ICAR- Vivekananda Parvatiya Krishi  
111 Anusandhan Sansthan (VPKAS), Almora, Uttarakhand, India (Tables 1 & 2). The test material includes  
112 released varieties (04), advanced breeding materials (44), and traditional rice varieties (02). In addition,  
113 two genotypes, PB-1 and Bala, were chosen as leaf and neck blast susceptible controls, respectively  
114 (Tables 1 and 2).

115 **Phenotyping of Rice germplasm lines for blast disease resistance**

116 A set of 50 rice hill germplasm collections were evaluated under the natural conditions at the rice  
117 blast hotspot area, ICAR-VPKAS, experimental farm, Hawalbagh (29°56'N, 79°40'E, and 1250m  
118 MSL), Almora, for their reactivity against leaf and neck blast. The evaluations were carried out in three  
119 replications over three years, from 2018 to 2020, during the rainy (Kharif) seasons. Sowings were done  
120 in two sets, one for leaf blast evaluations and the other for neck blast evaluations. Each rice entry (30  
121 plants/test entry) was raised in 50 cm long rows on nursery beds with a 10 cm row spacing in a uniform  
122 blast nursery for leaf blast (UBN). One line of PB-1 (susceptible check) was sown after every 5 entries  
123 of test accessions, as well as along the boundaries, to ensure adequate disease transmission. From 25  
124 days after sowing until the susceptibility check showed 85% of the blast disease symptom, the disease  
125 spectrum of all the test entries was recorded. A 0-9 scale devised by IRRI, Philippines [39], was used  
126 to visually record the disease reaction on each test entry.

127 Similarly, the other set was also tested for neck blast disease, but Bala was used as a susceptible  
128 control. The severity of the disease was graded on a 0-9 scale (IRRI, 2002), with 0 = no lesion or one  
129 or two tiny lesions on the panicles; 1 = symptom on several pedicels or secondary branches; 3 = lesions  
130 on a few primary branches or the middle part of panicle axis; 5 = moderate infection with lesions  
131 covering half of the node or the uppermost internode or the lower part of panicle axis; 7 = heavy  
132 infection, lesions abundant on the panicle base or uppermost internode or panicle axis near the base  
133 with more than 30% of filled grains; 9 = very heavy infection, around the panicle base or uppermost  
134 internode or the panicle axis near the base with less than 30 % of filled grains. At physiological maturity,  
135 the disease reaction was recorded, and the affected plants were evaluated on a disease scale, Highly  
136 resistant (HR) (0-3 score), moderately resistant (MR) (4-5), and susceptible (S) (6-9) were assigned to  
137 the test entries, respectively. Whenever differences in the disease spectrum were recorded, the higher  
138 disease was taken into account.

139 **DNA isolation and genotyping**

140 Genomic DNA was extracted from the young leaves of 50 rice germplasm lines and two  
141 susceptible controls using the CTAB technique [40]. The quality and quantity of isolated genomic DNA

142 were determined using a Thermo Fisher Scientific NanoDrop™ 1000 Spectrophotometer. After that,  
143 the isolated DNA samples were diluted to a concentration of 25 ng/μl in nuclease-free water for PCR  
144 amplification. Molecular profiling of 52 rice lines for the presence of major blast resistance genes was  
145 carried out using 25 linked or functional molecular markers. The detailed information on blast resistance  
146 genes and their corresponding primer pairs used in this investigation is listed in Table 2. About 25 ng  
147 of template DNA, 10 pmol of each forward and reverse primers, 25 mM MgCl<sub>2</sub>, 2 mM of each dNTPs,  
148 1X Taq buffer, 1U Taq DNA polymerase, and nuclease-free water were used in the PCR amplification.  
149 The PCR conditions were set as follows: initial denaturation at 94 °C for 5 minutes was followed by 35  
150 cycles of denaturation for 40 seconds at 94 °C, primer annealing for 40 seconds at varied temperatures  
151 (Table 3), and extension for 2 minutes at 72 °C were performed, followed by a final 10-minute extension  
152 at 72 °C. To double-check the results, PCR amplification was done twice for each marker. The amplified  
153 PCR products were resolved in ethidium bromide-stained 3% agarose gels and the scoring were done  
154 for the PCR analysis as presence (1) or absence (0).

#### 155 **Allele scoring and genetic diversity analysis**

156 The presence or absence of an allele was indicated as 1 and 0, respectively, in the amplified PCR  
157 products of 25 markers, which were scored as a binary matrix. Using a binary data matrix of 25 markers,  
158 the genetic distance and similarity coefficients for 52 rice accessions were calculated. Using the Cervus  
159 3.0 programme (Field Genetics Ltd., London, England) and POPGENE 32 software, different  
160 parameters such as the number of different alleles per locus (N<sub>a</sub>), number of effective alleles per locus  
161 (N<sub>e</sub>), Shannon's Information Index (I), and Expected Heterozygosity (H<sub>E</sub>) for each marker were  
162 calculated [41]. Subsequently, a heatmap of all the rice accessions was constructed using the pheatmap  
163 package with complete linkage clustering method and euclidean distance measure by R version 4.0.3  
164 statistical software for the presence or absence of 25 markers for both leaf and neck blast.

#### 165 **Association analysis**

166 To study the genetic relationship between blast resistance genes and the disease spectrum, we  
167 used TASSEL version 5.0 software with a general linear model (GLM) function [42]. Only the *P*-value  
168 was seen in 5% of the permutations for the most significant polymorphism in a region when the GLM  
169 model of TASSEL (v 5.0) software was performed with 1000 permutations of data. Using genotypic  
170 data collected with 25 molecular markers and pheatmap-based clustering with complete linkage  
171 clustering method and Euclidean distance measure, the genetic distance between the 52 rice accessions  
172 was estimated using R version 4.0.3 statistical programme.

#### 173 **Population structure analysis**

174 Based on genotyping data from 25 markers, the STRUCTURE software v 2.3.4 [43] was used to  
175 evaluate the population structure of 52 rice accessions. Using the admixture and correlated allele

176 frequencies model, each subpopulation (K) was estimated at different *K* values ranging from one to ten,  
 177 with five runs per *K* value. A total of 200000 burn-in periods and 200,000 Markov chain Monte Carlo  
 178 (MCMC) iterations were used in the STRUCTURE runs. Using the STRUCTURE HARVESTER  
 179 software, the highest delta K ( $\Delta K$ ) value was estimated to determine the most likely *K*-value [44]. The  
 180 pairwise fixation index (FST) was calculated using principal coordinate analysis (PCoA) based on a  
 181 binary data matrix of 25 markers, and analysis of molecular variance (AMOVA) was performed using  
 182 the GenAlEx version 6.502 software [45].

## 183 Results

### 184 Phenotyping of hill germplasm lines

185 Initially, the responsiveness of 277 rice accessions to rice blast disease was assessed. From these  
 186 277 accessions, we chose 52 genotypes based on their reaction to rice blast disease. i.e., resistant,  
 187 moderately resistant, and susceptible (Tables 1 & 2).

188 **Table 1** List of 52 rice accession used in this study

| Planting materials          | Genotypes                                                                                                                                                                                                                                                                                                                                                                                                                               |
|-----------------------------|-----------------------------------------------------------------------------------------------------------------------------------------------------------------------------------------------------------------------------------------------------------------------------------------------------------------------------------------------------------------------------------------------------------------------------------------|
| Released varieties          | VL <i>Dhan</i> 158, VL <i>Dhan</i> 68, VL <i>Dhan</i> 221 and VL <i>Dhan</i> 206                                                                                                                                                                                                                                                                                                                                                        |
| Advanced breeding materials | VL 8083, VL 8214, VL 8394, VL 8549, VL 8654, VL 20231, VL 20279, VL 20287, VL 20298, VL 20299, VL 20302, VL 20289, VL 31430, VL 31451, VL 31598, VL 31615, VL 31616, VL 31619, VL 31674, VL 31679, VL 31694, VL 31716, VL 31743, VL 31802, VL 31817, VL 31851, VL 31870, VL 31916, VL 31997, VL 32092, VL 32131, VL 32132, VL 32168, A-57, BL-122, BL-245, GSR-102, GSR-106, GSR-124, GSR-125, GSR-132, GSR-142, VOHP-3102 and VL 32197 |
| Traditional rice varieties  | VLK 39 and Someshwar                                                                                                                                                                                                                                                                                                                                                                                                                    |
| Susceptible checks          | PB-1 and Bala                                                                                                                                                                                                                                                                                                                                                                                                                           |

189

190 **Table 2** List of rice genotypes along with their pedigree.

| Sl. No. | Entry name         | Pedigree                            | Sl. No. | Entry name         | Pedigree                    |
|---------|--------------------|-------------------------------------|---------|--------------------|-----------------------------|
| 1       | VL 8083            | VL 6394/VL 6446                     | 27      | VL 31817           | Vivek <i>Dhan</i> 82/BL122  |
| 2       | VL 8214            | VL <i>Dhan</i> 81/VR539-2           | 28      | VL 31851           | VL 30424/IR78               |
| 3       | VL 8394            | VL6394/VL6446                       | 29      | VL 31870           | BL 122/IR 785-36            |
| 4       | VL 8549            | VL 3861/VL 6394                     | 30      | VL 31916           | VL <i>Dhan</i> 85/BL 245    |
| 5       | VL 8654            | RCPL 1-45/Vivek <i>Dhan</i> 154     | 31      | VL 31997           | Vivek <i>Dhan</i> 62/MAS-52 |
| 6       | VL <i>Dhan</i> 158 | RCPL 1-45/VL 3861                   | 32      | VL 32092           | VL <i>Dhan</i> 85/VOHP 3102 |
| 7       | VL 20231           | VL <i>Dhan</i> 81/Vandana           | 33      | VL 32131           | VL 10689/UPRI2005-15        |
| 8       | VL 20279           | VL 20240/Sawdhan                    | 34      | VL 32132           | VL 10689/UPRI2005-15        |
| 9       | VL 20287           | VHC 1462/VL 10499                   | 35      | VL 32168           | VL <i>Dhan</i> 65/VL30919   |
| 10      | VL 20298           | Annada/C101-A51                     | 36      | A-57               | -                           |
| 11      | VL 20299           | Annada/C101-A51                     | 37      | BL-122             | -                           |
| 12      | VL 20302           | VL <i>Dhan</i> 221/ VL 30927        | 38      | BL-245             | -                           |
| 13      | VL 20289           | VHC 1462/VL 10499                   | 39      | VL <i>Dhan</i> 221 | IR 2053-521-1-1-1/Ch 1039   |
| 14      | VL 31430           | Pant <i>Dhan</i> 6/VL 3288          | 40      | VLK 39             | China 1039/IR580-19-2-3-1   |
| 15      | VL 31451           | IR 72979/PSB RC 2 (IR 32809-26-3-3) | 41      | GSR-102            | -                           |
| 16      | VL 31598           | VL 3861/IR57257-34-1-2-1            | 42      | GSR-106            | -                           |
| 17      | VL <i>Dhan</i> 68  | VL 3861/SR 1818BF-4B-1-2-1-2        | 43      | GSR-124            | -                           |
| 18      | VL 31615           | VL 3861/SR 1818BF-4B-1-2-1-2        | 44      | GSR-125            | -                           |
| 19      | VL 31616           | VL 3861/SR 1818BF-4-B1-2-1-2        | 45      | GSR-132            | -                           |
| 20      | VL 31619           | VL 3861/SR 1818BF-4-B1-2-1-2        | 46      | GSR-142            | -                           |
| 21      | VL 31674           | C101-A51/ <i>O. minuta</i>          | 47      | VOHP-3102          | Local collection            |

| Sl. No. | Entry name | Pedigree                        | Sl. No. | Entry name  | Pedigree                                       |
|---------|------------|---------------------------------|---------|-------------|------------------------------------------------|
| 22      | VL 31679   | <i>O. minuta</i> /Vivek Dhan 82 | 48      | VL Dhan 206 | Pure line selection from Bamni (local variety) |
| 23      | VL 31694   | Vivek Dhan 82/IR57257-34        | 49      | VL 32197    | VL Dhan 81/Vandana                             |
| 24      | VL 31716   | <i>O. minuta</i> /IR57257-34    | 50      | Someshwar   | Local collection                               |
| 25      | VL 31743   | VL 30424/IR32809                | 51      | Bala        | N 22/T(N)1                                     |
| 26      | VL 31802   | VL 66/VL30424                   | 52      | PB-1        | Pusa 167/Karnal Local                          |

191  
 192 Of 52 rice genotypes, 29 (58%) and 22 (42%) rice genotypes were found to be highly resistant, 18  
 193 (36%) and 29 (57%) were moderately resistant, while 05 (6%) and 01 (1%) were highly susceptible to  
 194 leaf and neck blast, respectively. Incidentally, sixteen genotypes showed high resistance to both leaf  
 195 and neck blasts (Fig 1).

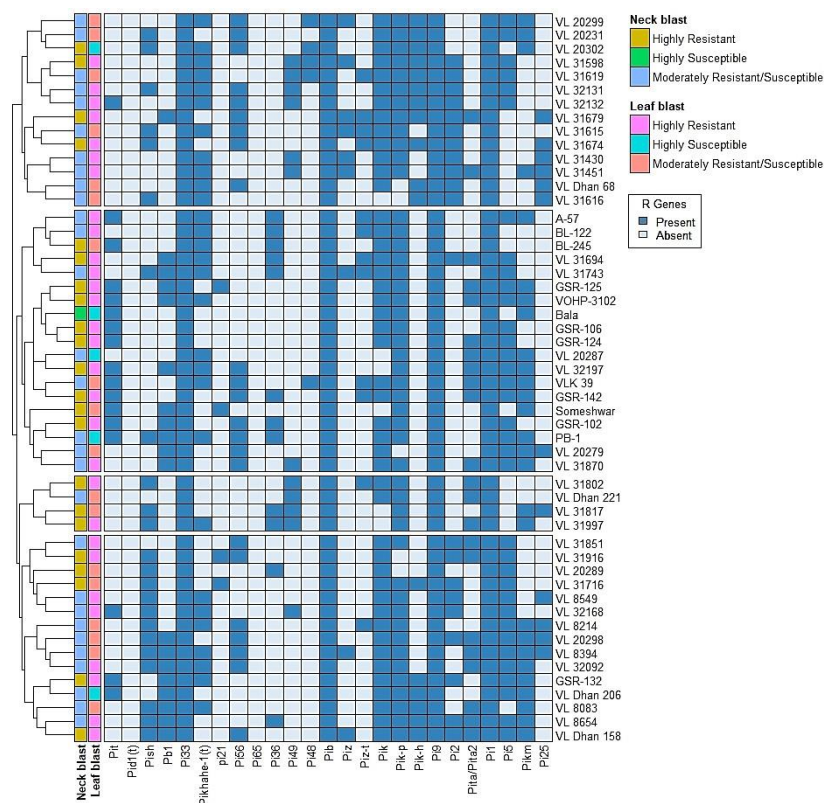

196  
 197 **Fig 1.** A clustered analysis based on the 25 molecular markers and Heatmap representing the summary of  
 198 phenotypic and genotypic data of 52 rice genotypes analyzed in this study.

199  
 200

201 **Genetic diversity of blast-resistant R genes**

202 The present study used a set of twenty-five markers (functional/linked markers) that corresponded  
 203 to the twenty-five R genes (Table 3). The gene frequency of the twenty-five blast R genes ranged from  
 204 32 to 60%, with the number of positive R-gene alleles ranging from 0 to 100%. Using a tk59-1 marker  
 205 to visualize a 733 bp amplicon, the rice blast R-gene *Pit* was discovered in 17 rice genotypes. *Pish* on  
 206 chromosome 1 was amplified with marker RM6648, resulting in a 207-bp band that was detected in 23  
 207 genotypes.

208 **Table 3** Details of markers used for molecular screening of blast resistance genes in 52 rice accessions.

| Genes        | Markers               | Forward (5' - 3')         | Reverse (5' - 3')         | Type of Marker *  | Annealing Temperature (°C) | References |
|--------------|-----------------------|---------------------------|---------------------------|-------------------|----------------------------|------------|
| Pit          | tk59-1                | ATGATAACCTCATCTCAATAAGT   | GTTGGAGCTACGGTTGTTTCAG    | FM                | 54                         | [48]       |
| Pid1(t)      | RM262                 | CATTCGGTCTCGGCTCAACT      | CAGAGCAAGTGGCTTGC         | LM                | 55                         | [63]       |
| Pish         | RM6648                | GATCGATCATGGCCAGAGAG      | ACAGCAGGTTGATGAGGACC      | LM                | 55                         | [34]       |
| Pb1          | RM26998               | ACGCACGCACATCTCTTCC       | CGGTTCTCCATCTGAAATCCCTAGC | LM                | 55                         | [21]       |
| Pi33         | RM72                  | CCGGCGATAAAACAATGAG       | GCATCGGTCTAACTAAGGG       | LM                | 55                         | [64]       |
| Pikhahe-1(t) | RM17496               | TAAACGGTGTGCAGCTTCTG      | TATTATGGGCGGTGCTAAC       | LM                | 54                         | [65]       |
| pi21         | pi21-79-3             | GATCTCATCGTCGACGCTGGC     | AGGGTACGGCACCAAGCTTG      | InDel             | 55                         | [27]       |
| Pi56         | CRG4-2                | CCTGTGCTCTTCCGAGAG        | GAATCCGGTAGTCAAGGTG       | Gene-specific     | 55                         | [66]       |
| Pi65         | SNP_3                 | TGCCACCAGCCATCTCAACAT     | ACCACATCACTCATGCCATCC     | InDel             | 54                         | [71]       |
| Pi36         | RM5647                | ACTCCGACTCGAGTTTTGTC      | AACTTGGTCGTGGACAGTGC      | LM                | 55                         | [72]       |
| Pi49         | RM6094                | TGCTTGATCTGTGTTGTC        | TAGCAGCACCAGCATGAAAAG     | LM                | 55                         | [67]       |
| Pi48         | RM5364                | GTATTACGCTCGATAGCGGC      | GTATCTTTCTCGCAATCGC       | LM                | 55                         | [68]       |
| Pib          | Pb28                  | GACTCGGTGACCAATTGCGC      | ATCAGGCCAGGCCAGATTG       | SNP               | 60                         | [48]       |
| Piz          | Z56592                | GGACCCGCGTTTTCCACGTGTA    | AGGAATCTATGCTAAGCATGAC    | SNP               | 60                         | [48]       |
| Piz-t        | Z156591               | TTGCTGAGCAATTGTAAACA      | ATCTCTTCATATATGAAGGCCAC   | SNP               | 60                         | [48]       |
| Pik          | K39512                | GCCACATCAATGGTACAACGTT    | CCAGAAATTACAGGCTCTGG      | SNP               | 60                         | [48]       |
| Pik-p        | K3957                 | ATAGTTGAATGTATGGAATGGAAT  | CTGCGCCAAGCAATAAAGTC      | SNP               | 60                         | [48]       |
| Pik-h        | Candidate gene marker | CATGAGTCCATTACTATTCTCT    | ACATTGGTAGTAGTCAATGICA    | Gene-based marker | 55                         | [69]       |
| Pi9          | Pi9-i                 | GCTGTGCTCCAAATGAGGAT      | GCGATCTCACATCCTTTGCT      | FNP               | 54                         | [52]       |
| Pi2          | Pi2-i                 | CAGCGATGGTATGAGCACA       | CGTTCCTATACTGCCACATCG     | FNP               | 52                         | [52]       |
| Pita/Pita2   | Pita3                 | AGTCGTGCGATGCGAGGACAGAAAC | GCATTCTCCAACCCTTTGATGCAT  | SNP               | 59                         | [48]       |
| Pi1          | RM1233                | GTGTAATCATGGGCACGTG       | AGATTGGCTCCTGAAGAAGG      | SSR               | 55                         | [40]       |
| Pi5          | 40N23R                | TGTGAGGCAACAATGCTATTGCG   | CTATGAGTTCATATGTTGAGGCT   | InDel             | 55                         | [40]       |
| Pikm         | k2167                 | CGTGTGTCGCTGAAATCTG       | CACGAACAAGAGTGTGTCGG      | InDel             | 55                         | [40]       |
| Pi25         | CAP1                  | TGAAATGGGTGAAAGATGAG      | GCCACATCATAATCCTTGA       | CAPS              | 55                         | [70]       |

209 \* FM, functional marker; LM, linked marker; InDel, insertion-deletion marker; FNP, functional nucleotide polymorphism;  
 210 SNP, single nucleotide polymorphism; CAPS, Cleaved Amplified Polymorphism Sequences

211  
 212 A 137-bp amplicon corresponding to the RM26998 marker was used to find the *Pb1* gene on  
 213 chromosome 11 in 19 genotypes. In 29 rice germplasm lines, the marker RM17496 was able to amplify  
 214 the *Pikhahe-1(t)* gene with a fragment size of 84 bp. For the recessive blast-resistant gene *pi21*, only  
 215 four genotypes were determined to be positive. The existence of the blast resistance gene *Pi56* on  
 216 chromosome 9 was detected using the gene-specific marker CRG4-2, which was found in 23 genotypes.  
 217 Using the linked marker RM5647, the blast resistance genes *Pi36* (chromosome 8) were discovered in

218 12 genotypes. The *Pi49* gene, which is located on chromosome 11, was found in 12 genotypes after 182  
219 bp were seen with the RM6094 marker. Using the RM5364 primer, the *Pi48* gene was discovered in  
220 five genotypes.

221 The *R* genes, *Piz*, and *Piz-t* on chromosome 6 were amplified using SNP markers Z56592 and  
222 Zt56591, which revealed their presence in nine and twelve entries, respectively. Visualization of 112  
223 bp, 148 bp, and 1500 bp amplicons corresponding to the K39512, K3957, and a gene-based marker,  
224 respectively, revealed the *Pik*, *Pik-p*, and *Pik-h* genes on chromosome 11. The genes *Pik*, *Pik-p*, and  
225 *Pik-h* were found in 46, 47, and 17 accessions, respectively. The *Pi2* gene was discovered using the  
226 *Pi2-i* primer in twenty-one entries, resulting in positive bands. The major blast resistance gene  
227 *Pita/Pita2*, which was scored by visualization of an 861 bp amplicon utilizing the *Pita3* marker, was  
228 found in 22 genotypes. The *Pi5* gene was discovered in 35 genotypes, which was confirmed using the  
229 marker 40N23R. The *Pikm* gene was found in twenty-seven genotypes after PCR amplification. *Pi25*  
230 was found in twelve genotypes using the *CAP1* primer, which produced a 406-bp amplicon. The *R*  
231 genes *Pi33*, *Pib*, *Pi9*, and *Pi1* were detected in all genotypes; however, the *Pid1(t)* and *Pi65* genes were  
232 not discovered in any of the fifty-two genotypes examined in this study. The phenotypic and genotypic  
233 data of the 52 rice accessions studied in this investigation are summarized in Figure 1.

#### 234 Cluster analysis

235 R-software was used to do the cluster analysis, which separated the 52 rice accessions into two  
236 primary clusters. Cluster I had 14 genotypes, seven and four of which were found to be highly resistant  
237 to leaf and neck blast, respectively, and three of which, VL31598, VL31679, and VL31674, were shown  
238 to be resistant to both leaf and neck blast. Cluster II was divided into three subgroups, the first of which  
239 contained a large number of genotypes (19), including nine genotypes resistant to both leaf and neck  
240 blast. On the other hand, two susceptible checks (Bala and PB-1) were also clustered together. Subgroup  
241 II is made up of four genotypes: VL 31802, VL 31817, VL 31997, and VL *Dhan* 221. Except for VL  
242 *Dhan* 221, all three genotypes are resistant to neck blast. Subgroup III has fifteen genotypes, eight and  
243 five genotypes showed high resistance to leaf and neck blast, respectively, and three of which were  
244 common for both leaf and neck blast resistance, including VL *Dhan* 158, GSR-132, and VL31916.  
245 Except for VL *Dhan* 206, the majority of the genotypes exhibited moderate resistance to either leaf or  
246 neck blast (Figure 1).

247 The genotypic data from the 25 markers was used to calculate genetic diversity measures  
248 including the number of distinct alleles per locus ( $N_a$ ), the number of effective alleles per locus ( $N_e$ ),  
249 Shannon's Information Index (I), and Expected Heterozygosity (HE). A total of 44 alleles were  
250 generated from 25 loci or markers (Table 4). The average number of alleles per locus ( $N_a$ ) was 1.76,  
251 with a range of 1 to 2. The number of effective alleles per locus ( $N_e$ ) ranged from 1 to 1.99, with an  
252 average of 1.49. Shannon's Information Index (I) ranged from 0 to 0.692 (*Pikm*), with an average of

253 0.42. The Expected Heterozygosity (HE) ranged from 0 (Pid1(t), Pi33, Pi65, Pib, Pi9(Pi9-i), and Pi1)  
 254 to 0.499 (Pikm) with an average of 0.285.

255 **Table 4** Analysis of the number of alleles, Shannon's Information Index, observed and expected Heterozygosity.

| Locus        | Na    | Ne    | I     | He    |
|--------------|-------|-------|-------|-------|
| Pit          | 2.000 | 1.786 | 0.632 | 0.440 |
| Pid1(t)      | 1.000 | 1.000 | 0.000 | 0.000 |
| Pish         | 2.000 | 1.974 | 0.686 | 0.493 |
| Pb1          | 2.000 | 1.865 | 0.656 | 0.464 |
| Pi33         | 1.000 | 1.000 | 0.000 | 0.000 |
| Pikhahe-1(t) | 2.000 | 1.974 | 0.686 | 0.493 |
| pi21         | 2.000 | 1.166 | 0.271 | 0.142 |
| Pi56         | 2.000 | 1.974 | 0.686 | 0.493 |
| Pi65         | 1.000 | 1.000 | 0.000 | 0.000 |
| Pi36         | 2.000 | 1.550 | 0.540 | 0.355 |
| Pi49         | 2.000 | 1.550 | 0.540 | 0.355 |
| Pi48         | 2.000 | 1.210 | 0.317 | 0.174 |
| Pib          | 1.000 | 1.000 | 0.000 | 0.000 |
| Piz          | 2.000 | 1.401 | 0.461 | 0.286 |
| Piz-t        | 2.000 | 1.550 | 0.540 | 0.355 |
| Pik          | 2.000 | 1.257 | 0.358 | 0.204 |
| Pik-p        | 2.000 | 1.210 | 0.317 | 0.174 |
| Pik-h        | 2.000 | 1.786 | 0.632 | 0.440 |
| Pi9 (Pi9-i)  | 1.000 | 1.000 | 0.000 | 0.000 |
| Pi2 (Pi2-i)  | 2.000 | 1.929 | 0.675 | 0.482 |
| Pita (Pita3) | 2.000 | 1.954 | 0.681 | 0.488 |
| Pi1          | 1.000 | 1.000 | 0.000 | 0.000 |
| Pi5          | 2.000 | 1.786 | 0.632 | 0.440 |
| Pikm         | 2.000 | 1.997 | 0.692 | 0.499 |
| Pi25         | 2.000 | 1.550 | 0.540 | 0.355 |

256

#### 257 Association analysis

258 The genetic association of markers with leaf and neck blast disease was examined using the  
 259 general linear model (GLM) function to see if there was any evidence of a significant link between  
 260 gene-specific markers and the disease reaction. Only two markers (RM5647 and K39512), which  
 261 correspond to the blast-resistant genes *Pi36* and *Pik*, respectively, showed a significant association with  
 262 the neck blast disease, while only three markers (Pi2-i, Pita3, and k2167), which correspond to the blast-  
 263 resistant genes *Pi2*, *Pita/Pita2*, and *Pikm*, respectively, showed a significant association with the leaf  
 264 blast disease (Table 5). For leaf blast, the associated markers showed a phenotypic variance of 7.2% to  
 265 12.2%. The marker k2167, which is linked to the *Pikm* gene, was shown to have the maximum  
 266 phenotypic variance. The markers K39512 and RM5647, corresponding to the blast-resistant genes *Pik*  
 267 and *Pi36*, respectively, showed a phenotypic variance of 4.7 and 5.2% for neck blast. The remaining  
 268 twenty markers, on the other hand, showed no significant association with blast disease ( $p \leq 0.1$ ).

269

270



271 **Table 5** Genetic association of blast resistant genes with rice neck and leaf blast disease in 52 genotypes.

| Marker       | Neck blast     |                       | Leaf blast     |                       |
|--------------|----------------|-----------------------|----------------|-----------------------|
|              | <i>P</i> value | marker_R <sup>2</sup> | <i>P</i> value | marker_R <sup>2</sup> |
| Pit          | 0.31011        | 0.0206                | 0.94482        | 9.68E-05              |
| Pid1(t)      | NaN            | 0                     | NaN            | 0                     |
| Pish         | 0.97709        | 1.67E-05              | 0.76334        | 0.00183               |
| Pb1          | 0.7654         | 0.0018                | 0.97428        | 2.10E-05              |
| Pi33         | NaN            | 0                     | NaN            | 0                     |
| Pikhahe-1(t) | 0.26063        | 0.02524               | 0.77591        | 0.00164               |
| pi21         | 0.23418        | 0.02818               | 0.98122        | 1.12E-05              |
| Pi56         | 0.85031        | 7.19E-04              | 0.40692        | 0.0138                |
| Pi65         | NaN            | 0                     | NaN            | 0                     |
| Pi36         | 0.1001         | <b>0.05253*</b>       | 0.46899        | 0.01054               |
| Pi49         | 0.74584        | 0.00212               | 0.16333        | 0.03849               |
| Pi48         | 0.66804        | 0.00371               | 0.18689        | 0.03458               |
| Pib          | NaN            | 0                     | NaN            | 0                     |
| Piz          | 0.62943        | 0.00469               | 0.31383        | 0.02028               |
| Piz-t        | 0.93256        | 1.45E-04              | 0.16943        | 0.03742               |
| Pik          | 0.10002        | <b>0.0479*</b>        | 0.1949         | 0.03337               |
| Pik-p        | 0.84113        | 8.11E-04              | 0.46584        | 0.01069               |
| Pik-h        | 0.78264        | 0.00154               | 0.90339        | 2.98E-04              |
| Pi9 (Pi9-i)  | NaN            | 0                     | NaN            | 0                     |
| Pi2 (Pi2-i)  | 0.43981        | 0.01198               | 0.01374        | <b>0.1154**</b>       |
| Pita (Pita3) | 0.62468        | 0.00482               | 0.05363        | <b>0.07247**</b>      |
| Pi1          | NaN            | 0                     | NaN            | 0                     |
| Pi5          | 0.77264        | 0.00168               | 0.33685        | 0.01846               |
| Pikm         | 0.1383         | 0.04341               | 0.01114        | <b>0.12202**</b>      |
| Pi25         | 0.64389        | 0.00431               | 0.6185         | 0.005                 |

272 \* & \*\* Significant at *P* value <0.1 and <0.05 respectively

273

274 **Population structure analysis**

275 Using STRUCTURE software, all 52 rice genotypes were examined for population structure  
 276 estimation for leaf and neck blast disease based on 25 markers. The Adhoc Measure *K* peak plateau was  
 277 discovered to be *K* = 2 (Fig 2), indicating that the complete 52 rice genotypes were divided into two  
 278 subgroups (SG1 and SG2).

279 All populations were divided into two major subgroups with eight admixture levels based on an  
 280 ancestry threshold of >60 % (Table 6). SG1 was made up of the most genotypes identified to be highly  
 281 resistant to neck blast. The majority of genotypes identified to be highly resistant to leaf blast, on the  
 282 other hand, were concentrated in SG2. Genotypes with moderate resistance to both leaf and neck blast  
 283 were clustered together in SG2, while genotypes with high susceptibility to both leaf and neck blast  
 284 were grouped together in SG1.

285

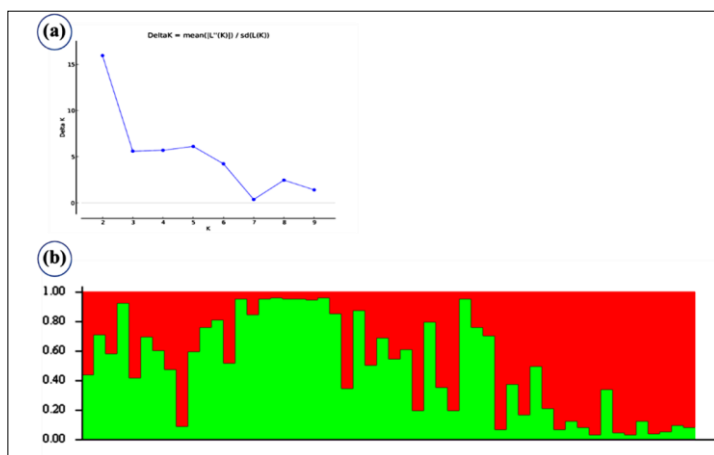

286  
287 **Fig 2.** Population structure analysis of 52 rice genotypes (a) The maximum of ad hoc measure  $\Delta K$  was observed  
288 to be  $K=3$  (b) Estimated population structure graph separated the whole population into two subgroups.  
289

290 **Table 6** Population structure group of 52 genotypes based on inferred ancestry values.

| Genotypes          | Inferred Ancestry |       | Structure group |
|--------------------|-------------------|-------|-----------------|
|                    | Q1                | Q2    |                 |
| VL 8083            | 0.560             | 0.44  | AD              |
| VL 8214            | 0.291             | 0.709 | SG2             |
| VL 8394            | 0.419             | 0.581 | AD              |
| VL 8549            | 0.076             | 0.924 | SG2             |
| VL 8654            | 0.582             | 0.418 | AD              |
| VL <i>Dhan</i> 158 | 0.302             | 0.698 | SG2             |
| VL 20231           | 0.398             | 0.602 | SG2             |
| VL 20279           | 0.527             | 0.473 | AD              |
| VL 20287           | 0.913             | 0.087 | SG1             |
| VL 20298           | 0.403             | 0.601 | SG2             |
| VL 20299           | 0.237             | 0.763 | SG2             |
| VL 20302           | 0.186             | 0.814 | SG2             |
| VL 20289           | 0.484             | 0.516 | AD              |
| VL 31430           | 0.047             | 0.953 | SG2             |
| VL 31451           | 0.151             | 0.849 | SG2             |
| VL 31598           | 0.045             | 0.955 | SG2             |
| VL <i>Dhan</i> 68  | 0.039             | 0.961 | SG2             |
| VL 31615           | 0.048             | 0.952 | SG2             |
| VL 31616           | 0.05              | 0.95  | SG2             |
| VL 31619           | 0.055             | 0.945 | SG2             |
| VL 31674           | 0.04              | 0.96  | SG2             |
| VL 31679           | 0.145             | 0.855 | SG2             |
| VL 31694           | 0.657             | 0.343 | SG1             |
| VL 31716           | 0.123             | 0.877 | SG2             |
| VL 31743           | 0.495             | 0.505 | AD              |
| VL 31802           | 0.313             | 0.687 | SG2             |
| VL 31817           | 0.453             | 0.547 | AD              |
| VL 31851           | 0.388             | 0.612 | SG2             |
| VL 31870           | 0.806             | 0.194 | SG1             |
| VL 31916           | 0.201             | 0.799 | SG2             |

| Genotypes          | Inferred Ancestry |       | Structure group |
|--------------------|-------------------|-------|-----------------|
|                    | Q1                | Q2    |                 |
| VL 31997           | 0.647             | 0.353 | SG1             |
| VL 32092           | 0.807             | 0.193 | SG1             |
| VL 32131           | 0.044             | 0.956 | SG2             |
| VL 32132           | 0.24              | 0.76  | SG2             |
| VL 32168           | 0.296             | 0.704 | SG2             |
| A-57               | 0.933             | 0.067 | SG1             |
| BL-122             | 0.626             | 0.374 | SG1             |
| BL-245             | 0.832             | 0.168 | SG1             |
| VL <i>Dhan</i> 221 | 0.503             | 0.497 | AD              |
| VLK 39             | 0.79              | 0.21  | SG1             |
| GSR-102            | 0.933             | 0.067 | SG1             |
| GSR-106            | 0.875             | 0.125 | SG1             |
| GSR-124            | 0.915             | 0.085 | SG1             |
| GSR-125            | 0.968             | 0.032 | SG1             |
| GSR-132            | 0.658             | 0.342 | SG1             |
| GSR-142            | 0.954             | 0.046 | SG1             |
| VOHP-3102          | 0.965             | 0.035 | SG1             |
| VL <i>Dhan</i> 206 | 0.878             | 0.122 | SG1             |
| VL 32197           | 0.964             | 0.036 | SG1             |
| Someshwar          | 0.944             | 0.056 | SG1             |
| Bala               | 0.904             | 0.096 | SG1             |
| PB-1               | 0.92              | 0.08  | SG1             |

291  
292 PCoA analysis has been carried out to establish the genetic relationship among the rice genotypes.  
293 PCoA analysis revealed that the first two axes explained 17.18 % and 12.29 % of the total variance  
294 (Table 7 and Fig 3). In PCoA, leaf blast-resistant genotypes were largely distributed among 1<sup>st</sup> and 2<sup>nd</sup>  
295 quadrants; on the other hand, most genotypes showed neck blast-resistant were concentrated in the 2<sup>nd</sup>  
296 quadrant. The genotypes found moderately resistant to both leaf and neck blast resistance were mostly  
297 distributed among the 1<sup>st</sup>, 3<sup>rd</sup>, and 4<sup>th</sup> quadrants, whereas susceptible genotypes were concentrated in  
298 the 2<sup>nd</sup> quadrant.

299 **Table 7** Percentage of variation explained by the first 3 axes using blast resistance gene in PCoA.

| Axis                                 | 1     | 2     | 3     |
|--------------------------------------|-------|-------|-------|
| Variation of the individual axis (%) | 17.18 | 12.29 | 9.21  |
| Cumulative variation (%)             | 17.18 | 29.47 | 38.67 |



316 cultivars across a large area, the pathogen population is subjected to selection pressure, causing it to  
317 establish new races. Rice production has become a global threat as a result of the emergence of these  
318 new harmful races. However, the problem can be avoided by finding possible donors for unique func-  
319 tional genes or alleles that will help to overcome the disease and ensure future rice harvests [12,37].  
320 The present experiment investigated the genetic diversity of released varieties, advanced breeding ma-  
321 terials, and traditional rice varieties for blast resistance genes using 25 molecular markers.

322 In this study, we used functional/gene-based molecular markers to genotype fifty-two rice hill  
323 germplasm collections for 25 major blast-resistant genes, in addition to field evaluations. We examined  
324 52 rice accessions for leaf blast disease resistance in the uniform blast nursery and found that 29 (58%)  
325 and 22 (42%) genotypes were highly resistant to leaf and neck blast disease, respectively. Surprisingly,  
326 16 accessions were found to be common for both leaf and neck blast resistance among the highly re-  
327 sistant rice accessions. With one released variety, VL *Dhan* 158, the vast majority of these accessions  
~~328 are advanced breeding materials. Susan et al. [52] examined 288 landraces for rice blast disease re-~~  
~~329 sistance and discovered that 75 were highly resistant, 127 were moderately resistant, and 86 were found~~  
~~330 susceptible. Another study looked at 358 rice accessions for resistance to neck blast and found that 124~~  
~~331 328 cultivars were resistant and 234 cultivars were susceptible, respectively [52].~~

332 329 Identification of the individual resistance based on phenotype is typically challenging because it is  
333 330 heavily influenced by developmental stage and environmental factors. However, using a linked marker  
334 331 associated with the *R* genes is the easiest and most reliable way for identifying individual/multiple  
335 332 gene(s) [48]. ~~The identification of blast *R* genes in various germplasms can be done with the use of~~  
336 333 ~~linked molecular markers [49,50].~~ The frequency of *R*-gene positive alleles ranged from 0% to 100%,  
337 334 with the genetic frequency of 25 major blast resistance genes ranging from 32% to 60%. The most  
338 335 positive alleles for the fifteen resistance genes are found in only two accessions (VL 8394 and VL *Dhan*  
339 336 158). Our findings are similar to those of Yadav et al. [47] and Susan et al. [52], who reported gene  
340 337 frequencies ranging from 0 % to 100 % in 80 rice varieties released by National Rice Research Institute  
341 338 (NRRRI), Cuttack, 9.4 % to 100 % in 32 Chinese rice germplasm, and 6 % to 27 % in 288 Indian land-  
342 339 races, respectively. The *R*-genes *Pib*, *Pi9*, *Pi1*, and *Pi33* appeared to be present in all rice accessions.  
343 340 Our findings match those of Yadav et al. [47], who discovered the *Pib* gene in all eighty rice accessions  
344 341 studied. Similarly, the *Pi9* gene was discovered in 51 Indian landraces [47] and 40 Chinese rice varieties  
345 342 [52]. However, just a few studies have documented the *Pi9* gene's rare prevalence [53,40]. This could  
346 343 be owing to the *Pi9* gene's origin in the wild species *O. minuta* and its subsequent introduction into  
347 344 Indica rice [53]. The *Pi1* gene was detected in 39 landraces with a frequency of 46.98 %, according to  
348 345 Ingole et al. (2014). The presence of the *Pi33* gene was discovered in 77 accessions in another investi-  
349 346 gation [5].

350 347 The genes *Pit*, *Pish*, and *Pikhahe-1(t)* were found in 17, 23, and 29 accessions, respectively. They  
351 348 are also found in the majority of accessions, according to earlier studies [12,47]. In twenty-three acces-

Formatted: Space Before: 6.3 pt

sions, the *Pi56* gene was found. Although it has previously been detected in 27 landraces from north-eastern India [47] and 26 NRRI Cuttack, released varieties, the gene *Pi5* was found in 35 accessions [40]. Nine and twelve accessions, respectively, have the *R* genes *Piz* and *Piz-t*. However, there was no significant correlation was found between these two *R* genes and observed phenotypes. Similarly, they show partial resistance to the genotypes examined by Yadav et al. [47] and Susan et al. [52]. The *Pi2* and *Pita/Pita2* genes were detected in the majority of the rice accessions with high resistance to leaf blast; however, a few genotypes without either of these genes were also resistant to leaf blast and may contain other unique *R*-genes/alleles. Except for VL 20287, which tested positive for the *Pita/Pita2* gene, the genotypes that rated highly vulnerable to leaf blast did not include either of these two genes. Both the *Pi2* and *Pita/Pita2* genes express an NBS-LRR type *R* protein that is resistant to rice leaf blast disease across a broad spectrum of pathogenic races [55,56].

In 19 accessions, the panicle blast resistance gene *Pb1* was found. Only 9 accessions were found to have high resistance to neck blast, while the other ten showed moderate resistance. The *Pb1* gene is a quantitative resistance gene that confers broad-spectrum resistance to all races. Despite having the *Pb1* gene, 10 accessions were found to have only moderate resistance to neck blast. This could be owing to the involvement of at least four QTLs in neck blast resistance, three of which, Chr7, Chr9, and Chr11, have a negative impact on *Pb1*-mediated resistance, while Chr8, on the other hand, has a positive impact. These four QTLs are expected to influence the *Pb1*-mediated resistance either individually or in combination with others [57]. As of today, a few *R* genes, *Pi25*, *Pb1*, *Pi64*, *Pi-jnw1*, and *Pi68(t)* [20-24] and QTLs like, *qNBL-9*, *qNBL-10*, *qNBL-5* [58], *qNB11-1*, *qNB11-3*, *qNB1-1*, *qNB1-2*, *qNB1-3* [59], *qPbh11-1* and *qPbh7-1*, [60] were found to confer resistance to neck blast. Among them, *Pi64*, and *Pi68(t)* were identified for the leaf as well as neck blast resistance. The *pi21* gene was discovered in just four accessions. Surprisingly, all four accessions had high resistance to neck blast, while only the two genotypes had high and moderate resistance to leaf blast disease. The *pi21* gene is a quantitative resistance gene for rice blast disease that offers broad-spectrum resistance [61].

The distance-based clustering was evaluated using genotype data, which divided the 52 germplasm into two primary groupings. Cluster I genotypes was moderately resistant to leaf and neck blast, whereas Cluster II genotypes are highly resistant to both leaf and neck blast. Similarly, the population structure analysis separated the 52 rice accessions into two subpopulations (SG1 and SG2), each with eight admixtures. Surprisingly, the population structure may be able to distinguish between resistant, moderately resistant, and susceptible germplasm. Similarly, the population structure was able to differentiate the 80 NRVs and 288 germplasm into resistant and susceptible [12,47].

The leaf and neck blast-resistant genotypes are found in the first and second quadrants of the PCoA analysis, whereas moderately resistant genotypes were found in the first, third, and fourth quadrants. Previous research has also divided resistant and susceptible germplasm into distinct categories [40,47]. A statistical approach for estimating molecular variance in a single species is the analysis of molecular

Formatted: Space Before: 6.3 pt

388386 variance (AMOVA). The AMOVA analysis revealed that there is the highest diversity within the pop-  
389387 ulation and minimal diversity between populations.

390388 \_\_\_\_\_. As a result of association mapping investigations, several genes influencing significant features  
391389 have been uncovered, and it is now being utilized to deconstruct the genetic basis of many new qualities  
392390 [62]. Two markers related to blast resistant genes *Pi36* and *Pik* were found to be strongly associated  
393391 with neck blast resistance, whereas three markers related to blast resistant genes *Pi2*, *Pita/Pita2*, and  
394392 *Pikm* were found to be significantly associated with leaf blast resistance. Previous research on associa-  
395393 tion mapping and blast disease resistance has shown its effectiveness in identifying markers associated  
396394 with QTLs and/or resistance genes giving blast resistance [12,33,40]. The identified resistant rice ac-  
397395 cessions could be used as donors in future breeding projects because they come from a variety of genetic  
398396 origins. These resistant accessions might then be studied for the existence of novel functional genes/al-  
399397 leles, allowing them to be exploited in rice improvement programs tailored to the needs of agricultural  
400398 systems.

#### 401399 **Conclusions**

402400 \_\_\_\_\_. The identification of resistant germplasm for both leaf and neck blast will be facilitated by pheno-  
403401 typing along with the molecular characterization of blast resistance genes. Our current research on leaf  
404402 and neck blast screening provided significant germplasm for breeders to employ as parent material for  
405403 blast resistance transfer, particularly neck blast resistance, in the production of resistant breeding lines.  
406404 Further identified resistant lines could be a valuable resource for blast resistance gene mapping, partic-  
407405 ularly in the case of neck blast disease.

408406 **Author Contributions:** Conceptualization, J.B., R.H., P.S.K., V.H.D., U.N., P.D., M.K.Y., K.K.M.,  
409407 J.P.A. and P.K.B.; methodology, J.B., R.H., P.S.K., V.H.D., U.N., P.D., M.K.Y., K.K.M., J.P.A. and  
410408 P.K.B.; software, J.B., and A.H.; validation, J.B., R.H., P.S.K., V.H.D., U.N., P.D., M.K.Y., K.K.M.,  
411409 J.P.A. and P.K.B.; formal analysis, J.B. and A.H.; investigation, J.B., R.H., P.S.K., V.H.D., U.N., P.D.,  
412410 M.K.Y., K.K.M., J.P.A. and P.K.B.; data curation, J.B. and A.H.; original draft preparation, J.B., R.H.,  
413411 P.S.K., V.H.D., U.N., P.D., M.K.Y., K.K.M., J.P.A. and P.K.B.; writing-review & editing, A.H. and  
414412 A.G.; Funding, A.H. and A.G. All authors read, commented on, and approved the final version of the  
415413 manuscript.

416414 **Funding:** This research was funded by ICAR-Vivekananda Parvatiya Krishi Anusandhan Sansthan,  
417415 Almora, Uttarakhand, India. This research was also partially funded by the Taif University Researchers  
418416 for funding this research with Supporting Project number (TURSP-2020/39), Taif University, Taif,  
419417 Saudi Arabia.

420418 **Institutional Review Board Statement:** Not applicable.

[424419](#) **Informed Consent Statement:** Not applicable.

[422420](#) **Data Availability Statement:** All data that support the findings of the present study are included in the [423421](#) article/supplementary material

[424422](#) **Acknowledgments:** We gratefully acknowledge the support of ICAR-Vivekananda Parvatiya Krishi [425423](#) Anusandhan Sansthan, Almora, Uttarakhand, India for financial support and facilities. We also thank [426424](#) Mr. Omkar Pratap, technical officer for his assistance in lab experiments. Also, the authors appreciated [427425](#) Taif University Researchers for funding this research with Supporting Project number (TURSP-[428426](#) 2020/39), Taif University, Taif, Saudi Arabia for providing financial support for the publication of this [429427](#) research.

[430428](#) **Conflicts of Interest:** No conflicts of interest are declared.

#### [434429](#) **References**

- [432430](#) 1. Pennisi, E. Armed and dangerous. *Science* **2010**, *327*, 804–805.
- [433431](#) 2. Fernandez1, J.; Orth, K. Rise of a Cereal Killer: The Biology of *Magnaporthe oryzae* Biotrophic [434432](#) Growth. *Trends Microbiol.* **2018**, *26*, 582 – 597.
- [435433](#) 3. Le, M.T.; Arie, T.; Teraoka, T. Population dynamics and pathogenic races of rice blast fungus, [436434](#) *Magnaporthe oryzae* in the Mekong Delta in Vietnam. *J. Gen. Plant Pathol.* **2010**, *76*, 177-182.
- [437435](#) 4. He, X.; Liu, X.; Wang, L.; Lin, F.; Cheng, Y.; Chen, Z.; Liao, Y.; Pan, Q. Identification of the [438436](#) novel recessive gene *pi55(t)* conferring resistance to *Magnaporthe oryzae*. *Sci. China Life Sci.* **2012**, *55*, 141–149.
- [439](#) 5. Singh, A.K.; Singh, P.K.; Arya, M.; Singh, N.K.; Singh, U.S. Molecular screening of blast re-  
[440](#) sistance genes in rice using SSR markers. *Plant Pathol. J.* **2015**, *31*, 12–24.
- [441](#) 6. Ou, S.H. *Rice Diseases*, 2nd ed.; Commonwealth Agricultural Bureaux International: Wallingford,  
[442](#) UK, 1985; p. 380.
- [443](#) 7. Choi, J.; Park, S.Y.; Kim, B.R.; Roh, J.H.; Oh, I.S.; Han, S.S.; Lea, Y.H. Comparative Analysis of  
[444](#) Pathogenicity and Phylogenetic Relationship in *Magnaporthe grisea* Species Complex. *PLoS ONE*,  
[445](#) **2013**, *8*, 1-8.
- [446](#) 8. Jeevan, B.; Rajashekara, H.; Mishra, K.K.; Subbanna, A.R.N.S.; Singh, A.K.; Sharma, D. Finger  
[447](#) millet blast disease: Potential threat to global nutrition security. In *Blast Disease of Cereal Crops*.  
[448](#) Nayaka S.C., Hosahatti R., Prakash G., Satyavathi C.T., Sharma R.: Nayaka S.C., Hosahatti R.,  
[449](#) Prakash G., Satyavathi C.T., Sharma R. (eds) Fungal Biology. Springer, Cham. 2021, pp 51–57.
- [450](#) 9. Yashaswini, C.; Reddy, N.P.; Pushpavati, B.; Rao, S.C.; Madhav, S.M. Prevalence of Rice blast  
[451](#) (*Magnaporthe oryzae*) incidence in South India. *Bulletin of Environment, Pharmacology and Life*  
[452](#) *Sci.* **2017**, *6*, 370-373.  
[453](#)



- 454 10. Ariya-anandech, K.; Chaipanya, C.; Teerasan, W.; Kate-Ngam, S.; Jantasuriyarat, C. Detection and  
455 allele identification of rice blast resistance gene, *Pik*, in Thai rice germplasm. *Agric. Nat. Resour.*  
456 **2018**, *52*, 525-535.
- 457 11. Sharma, T.R.; Rai, A.K.; Gupta, S.K.; Vijayan, J.; Devanna, B.N.; Ray, S. Rice blast management  
458 through host-plant resistance: retrospect and prospects. *Agric. Res.* **2012**, *1*:37-52.
- 459 12. Yadav, M.K.; Aravindan, S.; Ngangkham, U.; Raghu, S.; Prabhukarthikeyan, S.R.; Keerthana, U.;  
460 Marnd, B.C.; Adak, T.; Munda, S.; Deshmukh, R.; Pramesh, D.; Samantaray, S.; Rath, P.C. Blast  
461 resistance in Indian rice landraces: Genetic dissection by gene-specific markers. *PLoS ONE*, **2019**,  
462 *14*(1), 1-9.
- 463 13. Panda, G.; Sahu, C.; Yadav, M.K.; Aravindan, S.; Umakanta, N.; Raghu, S.; Prabhukarthikeyan,  
464 S.R.; Lenka, S.; Tiwari, J.K.; Kar, S.; Jena, M. Morphological and molecular characterization of  
465 *Magnaporthe oryzae* from Chhattisgarh. *ORYZA-An International Journal on Rice*. **2017**, *54*, 330-  
466 336.
- 467 14. Sahu, C.; Yadav, M.K.; Panda, G.; Aravindan, S.; Umakanta, N.; Raghu, S.; Prabhukarthikeyan,  
468 S.R.; Keerthana, U.; Adak, T.; Sharma, V.; Mohanty, M.R. Morphological and molecular charac-  
469 terization of *Magnaporthe oryzae* causing rice blast disease in Odisha. *ORYZA-An International*  
470 *Journal on Rice*. **2018**, *55*, 467-472.
- 471 15. Jeevan, B.; Gogoi, R.; Sharma, D.; Manjunatha, C.; Rajashekara, H.; Ram, D.; Mishra, K.K.; Mal-  
472 likarjuna, M.G. Genetic analysis of maydis leaf blight resistance in subtropical maize (*Zea mays*  
473 L.) germplasm. *J. Genet.* **2020**, *99*, 1-9.
- 474 16. Yamaguchi, I. Overview on the chemical control of rice blast disease. Kluwer Academic Publish-  
475 ers. 2004, pp 1-13.
- 476 17. Wang, G.L.; Valent, B. Durable resistance to rice blast. *Science*. **2017**, *355*, 906-907.
- 477 18. Kalia, S.; Rathour, R. Current status on mapping of genes for resistance to leaf- and neck-blast  
478 disease in rice. *3 Biotech*, **2019**, *9*, 1-14.
- 479 19. Ning, X.; Yunyu, W.; Aihong, L. Strategy for use of rice blast resistance genes in rice molecular  
480 breeding, *Rice Sci.* **2020**, *27*, 263-277
- 481 20. Zhuang, J.Y.; Ma, W.B.; Wu, J.L.; Chai, R.Y.; Lu, J.; Fan, Y.Y.; Jin, M.Z.; Leung, H.; Zheng, K.L.  
482 Mapping of leaf and neck blast resistance genes with resistance gene analog, RAPD and RFLP in  
483 rice. *Euphytica*, **2002**, *128*, 363-370.
- 484 21. Hayashi, N.; Inoue, H.; Kato, T.; Funao, T.; Shirota, M.; Shimizu, T.; Kanamori, H.; Yamane, H.;  
485 Hayano-Saito, Y.; Matsumoto, T.; Yano, M.; Takatsuji, H. Durable panicle blast-resistance gene  
486 *Pb1* encodes an atypical CC-NBS-LRR protein and was generated by acquiring a promoter through  
487 local genome duplication. *Plant J.* **2010**, *64*, 498-510.
- 488 22. Ma, J.; Lei, C.; Xu, X.; Hao, K.; Wang, J.; Cheng, Z.; Ma, X.; Ma, J.; Zhou, K.; Zhang, X.; Guo,  
489 X.; Wu, F.; Lin, Q.; Wang, C.; Zhai, H.; Wang, H.; Wan, J. *Pi64*, encoding a novel CC-NBS-LRR

- 490 protein, confers resistance to leaf and neck blast in rice. *Mol. Plant Microbe Interact.* **2015**, 28,  
491 558–568.
- 492 23. Wang, R.; Fang, W.; Guan, C.; He, W.; Bao, Y.; Zhang, H. Characterization and fine mapping of  
493 a blast resistant gene *Pi-jnw1* from the japonica rice landrace Jiangnanwan. *PLoS One*, **2016**, 11,  
494 1–12.
- 495 24. Devi, S.J.S.R.; Singh, K.; Umakanth, B.; Vishalakshi, B.; Rao, K.V.S.; Suneel, B.; Shusma, S.K.;  
496 Kadambari, G.K.M.; Prasad, M.S.; Senguttvel, P.; Shyamaladevi, D.P.; Madhav, M.S. Identifica-  
497 tion and characterization of a Large Effect QTL from *Oryza glumaepatula* revealed *Pi68(t)* as pu-  
498 tative candidate gene for rice blast resistance. *Rice*, **2020**, 13, 1–13.
- 499 25. Skamnioti, P.; Gurr, S.J. Against the grain: safeguarding rice from rice blast disease. *Trends Bio-*  
500 *technol.* **2009**, 27:141–150.
- 501 26. Liu, J.; Wang, X.; Mitchell, T.; Hu, Y.; Liu, X.; Dai, L.; Wang, G.L. Recent progress and under-  
502 standing of the molecular mechanisms of the rice- *Magnaporthe oryzae* interaction. *Mol. Plant*  
503 *Pathol.* **2010**, 11:419–427.
- 504 27. Fukuoka, S.; Saka, N.; Koga, H.; Ono, K.; Shimizu, T.; Ebana, K.; Hayashi, N.; Takahashi, A.;  
505 Hirochika, H.; Okuno, K.; Yano, M. Loss of function of a proline containing protein confers dura-  
506 ble disease resistance in rice. *Science*, 2009, 325, 998–1001.
- 507 28. Dean, R.A.; Talbot, N.J.; Ebbole, D.J.; Farman, M.L.; Mitchell, T.K.; Orbach, M.J.; Thon, M.;  
508 Kulkarni, R.; Xu, J.R.; Pan, H.; Read, N.D.; Lee, Y.H.; Carbone, I.; Brown, D.; Oh, Y.Y.; Donofrio,  
509 N.; Jeong, J.S.; Soanes, D.M.; Djonovic, S.; Kolomiets, E.; Rehmeyer, C.; Li, W.; Harding, M.;  
510 Kim, S.; Lebrun, M.H.; Bohnert, H.; Coughlan, S.; Butler, J.; Calvo, S.; Ma, L.J.; Nicol, R.; Purcell,  
511 S.; Nusbaum, C.; Galagan, J.E.; Birren, B.W. The genome sequence of the rice blast fungus *Mag-*  
512 *naporthe grisea*. *Nature*. **2005**, 434, 980–986.
- 513 29. Kang, S.; Lebrun, M.H.; Farrall, L.; Valent, B. Gain of virulence caused by insertion of a Pot3  
514 transposon in a *Magnaporthe grisea* avirulence gene. *Mol. Plant Microbe Interact.* **2001**, 14, 671-  
515 674.
- 516 30. Farman, M.L.; Eto, Y.; Nakao, T.; Tosa, Y.; Nakayashiki, H.; Mayama, S.; Leong, S.A. Analysis  
517 of the structure of the AVR1-CO39 avirulence locus in virulent rice-infecting isolates of *Mag-*  
518 *naporthe grisea*. *Mol. Plant Microbe Interact.* **2002**, 15, 6–16.
- 519 31. Bohnert, H.; Fudal, I.; Diou, W.; Tharreau, D.; Notteghem, J.; Lebrun, M. A putative polyketide  
520 synthase/peptide synthetase from *Magnaporthe grisea* signals pathogen attack to resistant rice.  
521 *Plant Cell*, **2004**, 16, 2499–2513.
- 522 32. Hittalmani, S.; Parco, A.; Mew, T.V.; Zeigler, R.S.; Huang, N. Fine mapping and DNA marker-  
523 assisted pyramiding of the three major genes for blast resistance in rice. *Theor. Appl. Genet.* **2000**,  
524 100, 1121–1128.
- 525 33. Wang, C.; Yang, Y.; Yuan, X.; Xu, Q.; Feng, Y.; Yu, H.; Wang, Y.; Wei, X. Genome-wide asso-  
526 ciation study of blast resistance in indica rice. *BMC Plant Biol.* **2014**, 14, 1–11.

- 527 34. Koide, Y.; Kawasaki, A.; Telebanco-Yanoria, M.J.; Hairmansis, A.; Nguyet, N.T.; Bigirimana, J.;  
528 Fujita, D.; Kobayashi, N.; Fukuta, Y. Development of pyramided lines with two resistance genes,  
529 *Pish* and *Pib*, for blast disease (*Magnaporthe oryzae* B. Couch) in rice (*Oryza sativa* L.). *Plant*  
530 *Breed.*, **2010**, 129, 670–675.
- 531 35. Zhang, P.; Liu, X.; Tong, H.; Lu, Y.; Li, J. Association mapping for important agronomic traits in  
532 core collection of rice (*Oryza sativa* L.) with SSR markers. *PLoS One*. **2014**, 9, 1-16.
- 533 36. Kumbhar, S.D.; Kulwal, P.L.; Patil, J.V.; Sarawate, C.D.; Gaikwad, A.P.; Jadhav, A.S. Genetic  
534 diversity and population structure in landraces and improved rice varieties from India. *Rice Sci.*  
535 **2015**, 22, 99-107.
- 536 37. Vasudevan, K.; Vera Cruz, C.M.; Gruissem, W.; Bhullar, N.K. Large-scale germplasm screening  
537 for identification of novel rice blast resistance sources. *Front. Plant Sci.* **2014**, 5, 1-9.
- 538 38. Singh, N.; Choudhury, D.R.; Tiwari, G.; Singh, A.K.; Kumar, S.; Srinivasan, K.; Tyagi, R.K.;  
539 Sharma, A.D.; Singh, N.K. Singh, R. Genetic diversity trend in Indian rice varieties: an analysis  
540 using SSR markers. *BMC Genet.* **2016**, 17, 1-13.
- 541 39. International Rice Research Institute (IRRI). Standard Evaluation System for Rice (SES). 2002.  
542 Available online:  
543 <http://www.knowledgebank.iri.org/images/docs/rice-standard-evaluation-system.pdf>
- 544 40. Yadav, M.K.; Aravindan, S.; Umakanta, N.; Shubudhi, H.N.; Bag, M.K.; Adak, T.; Jena, M. Use  
545 of molecular markers in identification and characterization of resistance to rice blast in India. *PLoS*  
546 *One*, **2017**, 12, 1–19.
- 547 41. Yeh, F.C. Population genetic analysis of co-dominant and dominant marker and quantitative traits.  
548 *Belg. J. Bot.* **1997**, 130:129-157.
- 549 42. Bradbury, P.J.; Zhang, Z.; Kroon, D.E.; Casstevens, T.M.; Ramdoss, Y.; Buckler, E.S. TASSEL:  
550 software for association mapping of complex traits in diverse samples. *Bioinformatics*, **2007**, 23,  
551 2633–2635.
- 552 43. Pritchard, J.K.; Stephens, M.; Donnelly, P. Inference of population structure using multilocus geno-  
553 type data. *Genetics*, **2000**, 155, 945-959.
- 554 44. Earl, D.A. STRUCTURE HARVESTER: a website and program for visualizing STRUCTURE  
555 output and implementing the Evanno method. *Conservation Genetics Resources*, **2012**, 4, 359–  
556 361.
- 557 45. Peakall, R.O.; Smouse, P.E. GENALEX 6.5: genetic analysis in EXCEL. Population genetic soft-  
558 ware for teaching and research. *Bioinformatics*, **2012**, 28, 2537–2539.
- 559 46. Tanksley, S.D.; Mc Couch, S.R. Seed banks and molecular maps: unlocking genetic potential from  
560 the wild. *Science*, **1997**, 277, 1063–1066.
- 561 47. Susan, A.; Yadav, M.K.; Kar, S.; Aravindan, S.; Ngangkham, U.; Raghu, S.; Prabhukarthikeyan,  
562 S.R.; Keerthana, U.; Mukherjee, S.C.; Salam, J.L.; Adak, T.; Banerjee, A.; Rath, P.C. Molecular

- 563 identification of blast resistance genes in rice landraces from northeastern India. *Plant Pathol.* **2019**,  
564 68, 537–546.
- 565 48. Hayashi, K.; Yoshida, H.; Ashikawa, I. Development of PCR-based allele-specific and InDel  
566 marker sets for nine rice blast resistance genes. *Theor. Appl. Genet.* **2006**, 113, 251–260.
- 567 49. Jia, Y.; Wang, Z.; Fjellstrom, R.G.; Moldenhauer, K.A.K.; Azam, M.D.A.; Correll, J.; Lee, F.N.;  
568 Xia, Y.; Rutger, J.N. Rice *Pi-ta* gene confers resistance to the major pathotypes of the rice blast  
569 fungus in the United States. *Phytopathology*, **2004**, 94, 296–301.
- 570 50. Ingole, K.D.; Prashanthi, S.K.; Krishnaraj, P.U. Mining for major blast resistance genes in rice  
571 landraces of Karnataka. *Indian J Genet Plant Breed.* **2014**, 74, 378–83.
- 572 51. Yan, L.; Yan, B.Y.; Peng, Y.L.; Ji, Z.J.; Zeng, Y.X.; Wu, H.L.; Yang, C.D. Molecular screening  
573 of blast resistance genes in rice germplasms resistant to *Magnaporthe oryzae*. *Rice Sci.* **2017**, 24,  
574 41–47.
- 575 52. Yang, Y.; Zhang, H.; Xuan, N.; Chen, G.; Liu, X.; Yao, F.; Ding, H. Identification of blast re-  
576 sistance genes in 358 rice germplasms (*Oryza sativa* L.) using functional molecular markers. *Eur.*  
577 *J. Plant Pathol.* **2017**, 148, 567–576.
- 578 53. Imam, J.; Alam, S.; Mandal, N.P.; Variar, M.; Shukla, P. Molecular screening for identification of  
579 blast resistance genes in North East and Eastern Indian rice germplasm (*Oryza sativa* L.) with PCR  
580 based makers. *Euphytica*, **2014**, 196, 199–211.
- 581 54. Singh, W.; Kapila, R.; Sharma, T.; Rathour, R. Genetic and physical mapping of a new allele of  
582 *Pik* locus from japonica rice ‘Lijiangxintuanheigu’. *Euphytica*, 205, 889–901.
- 583 55. Deng, Y.; Zhu, X.; Shen, Y.; He, Z. Genetic characterization and fine mapping of the blast re-  
584 sistance locus *Pigm(t)* tightly linked to *Pi2* and *Pi9* in a broad-spectrum resistant Chinese variety.  
585 *Theor. Appl. Genet.* **2006**, 113, 705–713.
- 586 56. Meng, X.; Xiao, G.; Teleanco-Yanoria, M.J.; Siazon, P.M.; Padilla, J.; Opulencia, R.; Bigirimana,  
587 J.; Habarugira, G.; Wu, J.; Li, M.; Wang, B.; Lu, G.D.; Zhou, B. The broad-spectrum rice blast  
588 resistance (R) gene *Pita2* encodes a novel R protein unique from *Pita*. *Rice*, **2020**, 13, 1-15.
- 589 57. Inoue, H.; Nakamura, M.; Mizubayashi, T.; Takahashi, A.; Sugano, S.; Fukuoka, S.; Hayashi, N.  
590 Panicle blast 1 (*Pbl1*) resistance is dependent on at least four QTLs in the rice genome. *Rice*, **2017**,  
591 10, 1-10.
- 592 58. Hittalmani, S.; Srinivasachary, B.P.; Shashidhar, H.E. Identifying major genes and QTLs for field  
593 resistance to neck blast in rice. In: Khush GS et al (eds) *Advances in rice genetics*. Rice Genetics  
594 Collection, Los Banos, **2003**, pp 248–250.
- 595 59. Noenplab, A.; Vanavichit, A.; Toojinda, T.; Sirithunyad, P.; Tragoonrung, S.; Sriprakhon, S.;  
596 Vongsaprom, C. QTL mapping for leaf and neck blast resistance in Khao Dawk Mali 105 and Jao  
597 Hom Nin recombinant inbred lines. *Sci. Asia*, **2006**, 32, 133–142.

- 598 60. Fang, N.; Wang, R.; He, W.; Yin, C.; Guan, C.; Chen, H.; Huang, J.; Wang, J.; Bao, Y.; Zhang, H.  
599 QTL mapping of panicle blast resistance in japonica landrace Heikezijing and its application in rice  
600 breeding. *Mol. Breed.* **2016**, *36*, 171–179.
- 601 61. Angeles-Shim, R.B.; Reyes, V.P.; del Valle, M.M.; Lapis, R.S.; Shim, J.; Sunohara, H.; Jena, K.K.;  
602 Ashikari, M.; Doi, K. Marker-assisted introgression of quantitative resistance gene *pi21* confers  
603 broad spectrum resistance to rice blast. *Rice Sci.* **2020**, *27*, 113–123.
- 604 62. Hall, D.; Tegström, C.; Ingvarsson Pär, K. Using association mapping to dissect the genetic basis  
605 of complex traits in plants. *Brief. Funct. Genom.* **2010**, *9*, 157–165.
- 606 63. Chen, X.W.; Li, S.G.; Xu, J.C.; Zhai, W.X.; Ling, Z.Z. Ma, B.T.; Wang, Y.P.; Wang, W.M.; Cao,  
607 G.; Ma, Y.Q.; Shang, J.J.; Zhao, X.F.; Zhou, K.D.; Zhu, L.H. Identification of two blast resistance  
608 genes in a rice variety, Digu. *J Phytopathol.* **2004**, *152*, 77–85.
- 609 64. Berruyer, R.; Adreht, H.; Milazzo, J.; Gaillard, S.; Berger, A.; Dioh, W.; Lebrun, M.H.; Tharreau,  
610 D. Identification and fine mapping of *Pi33*, the rice resistance gene corresponding to the *Mag-611*  
*naporthe grisea* avirulence gene ACE1. *Theor. Appl. Genet.* **2003**, *107*, 1139–1147.
- 612 65. Xu, X.; Chen, H.; Fujimura, T.; Kawasaki, S. Fine mapping of a strong QTL of field resistance  
613 against rice blast, *Pikahei-I(t)*, from upland rice Kahei, utilizing a novel resistance evaluation  
614 system in the greenhouse. *Theor. Appl. Genet.* **2008**, *117*, 997–1008.
- 615 66. Liu, Y.; Liu, B.; Zhu, X.; Yang, J.; Bordeos, A.; Wang, G.; Leach, J.E.; Leung, H. Fine-mapping  
616 and molecular marker development for *Pi56(t)*, a NBS-LRR gene conferring broad-spectrum re-  
617 sistance to *Magnaporthe oryzae* in rice. *Theor. Appl. Genet.* **2013**, *126*, 985–998.
- 618 67. Sun, P.; Liu, J.; Wang, Y.; Jiang, N.; Wang, S.; Dai, Y.; Gao, J.; Li, Z.; Pan, S.; Wang, D.; Li, W.;  
619 Liu, X.; Xiao, Y.; Liu, E.; Wang, G.L.; Dai, L. Molecular mapping of the blast resistance gene *Pi49*  
620 in the durably resistant rice cultivar Mowanggu. *Euphytica.* **2013**, *192*, 45–54.
- 621 68. Huang, H.; Huang, L.; Feng, G.; Wang, S.; Wang, Y.; Liu, J.; Jiang, N.; Yan, W.; Xu, L.; Sun, P.;  
622 Li, Z.; Pan, S.; Liu, X.; Xiao, Y.; Liu, E.; Dai, L.; Wang, G.L. Molecular mapping of the new blast  
623 resistance genes *Pi47* and *Pi48* in the durably resistant local rice cultivar Xiangzi-3150. *Phyto-*  
624 *pathology.* **2011**, *101*, 620–626.
- 625 69. Sharma, T.R.; Madhav, M.S.; Singh, B.K.; Shanker, P.; Jana, T.K.; Dalal, V.; Singh, N.K. High-  
626 resolution mapping, cloning and molecular characterization of the *Pi-kh* gene of rice, which confers  
627 resistance to *Magnaporthe grisea*. *Mol. Genet. Genom.* **2005**, *274*, 569–578.
- 628 70. Wang, Y.; Wang, D.; Deng, X.; Liu, J.; Sun, P.; Liu, Y.; Hang, H.; Jiang, N.; Kang, H.; Ning, Y.;  
629 Wang, Z.; Xiao, Y.; Liu, X.; Liu, E.; Dai, L.; Wang, G.L. Molecular mapping of the blast resistance  
630 genes *Pi2-I* and *Pi51(t)* in the durably resistant rice ‘Tianjinyeshengdao’. *Phytopathology.* **2012**,  
631 *102*, 779–786.
- 632 71. Zheng, W.; Wang, Y.; Wang, L.; Ma, Z.; Zhao, J.; Wang, P.; Zhang, L.; Liu, Z.; Lu, X. Genetic  
633 mapping and molecular marker development for *Pi65(t)*, a novel broad-spectrum resistance gene  
634 to rice blast using next-generation sequencing. *Theor. Appl. Genet.* **2016**, *129* 1035–1044.

635 72. Liu, Q.X.; Wang, L.; Chen, S.; Lin, F.; Pan, Q.H. Genetic and physical mapping of *Pi36(t)*, a novel  
636 rice blast resistance gene located on rice chromosome 8. *Mol. Genet. Genom.* **2005**, *274*, 394–401.
